# Supplementary material
Source: publisher figshare collection journal article supplement (https://gsajournals.figshare.com/ndownloader/files/26602820)
Supplement: Supplementary file 1 [file 26602820]

## Sheet: Table S1
Table S1. List of RNA-Seq, WGS, and 10x Chromium Libraries of Mitragyna speciosa.
SRA ID	Sequencing Strategy	Type	Tissue
SAMN16213049	RNA-Seq	Paired End	Root
SAMN16213050	RNA-Seq	Paired End	Leaf
SAMN16213051	WGS	Paired End	young leaf
SAMN16213051	WGS	Paired End	young leaf
SAMN16213052	10x Chromium Reads	Paired End	Young leaves
SAMN16213053	RNA-Seq	Single End	Young Leaves 1
SAMN16213054	RNA-Seq	Single End	Young Leaves 2
SAMN16213055	RNA-Seq	Single End	Young Leaves 3
SAMN16213056	RNA-Seq	Single End	Mature Leaves 1
SAMN16213057	RNA-Seq	Single End	Mature Leaves 2
SAMN16213058	RNA-Seq	Single End	Mature Leaves 3
SAMN16213059	RNA-Seq	Single End	Stems and Petioles 1
SAMN16213060	RNA-Seq	Single End	Stems and Petioles 2
SAMN16213061	RNA-Seq	Single End	Stems and Petioles 3
SAMN16213062	RNA-Seq	Single End	Leaf Bracts
SAMN16213063	RNA-Seq	Single End	Mature Leaves
SAMN16213064	RNA-Seq	Single End	Roots
SAMN16213065	RNA-Seq	Single End	Leaves 6 days after wounding (6DAW)

## Sheet: Table S2
Table S2. Chloroplast genomes used to identify sequences encoding the chloroplast genome in Mitragyna speciosa.
Accession ID	Description
EF044213.1	Coffea arabica chloroplast, complete genome
NC_008535.1	Coffea arabica chloroplast, complete genome
KY085909.1	Coffea arabica plastid, complete genome
KU500324.1	Coffea canephora chloroplast, complete genome
NC_030053.1	Coffea canephora chloroplast, complete genome
KY273445.1	Emmenopterys henryi voucher XGS20161127 chloroplast, complete genome
NC_036300.1	Emmenopterys henryi voucher XGS20161127 chloroplast, complete genome
KY562588.1	Galium mollugo plastid, complete genome
NC_036970.1	Galium mollugo plastid, complete genome
KT852576.1	Gynochthodes nanlingensis chloroplast, complete genome
NC_028614.1	Gynochthodes nanlingensis chloroplast, complete genome
KY085908.1	Mitragyna speciosa plastid, complete genome
NC_034698.1	Mitragyna speciosa plastid, complete genome
NC_028009.1	Morinda officinalis chloroplast, complete genome
KR869730.1	Morinda officinalis chloroplast, complete genome

## Sheet: Table S3
Table S3. Metrics of quality assessments based on alignment of whole genome shotgun sequencing to the final Mitragyna speciosa 'Rifat' assembly
SRA ID	Sequencing Strategy	Type	Tissue	Percent reads mapped	Portion mapped MAPQ>=20	Portion properly paired / portion mapped in pair
SAMN16213051	WGS	Paired End	young leaf	0.9588	0.821141	0.9942
SAMN16213051	WGS	Paired End	young leaf	0.9596	0.815868	0.9928
SAMN16213051	WGS	Paired End	young leaf	0.9693	0.866	0.9973
SAMN16213052	10x Chromium Reads	Paired End	young leaf	0.9779	0.877862	0.9922

## Sheet: Table S4
Table S4. Metrics of quality assessments based on alignment of RNA sequencing to the final Mitragyna speciosa 'Rifat' assembly
SRA ID	Type	Tissue	Read length	Total raw reads	Quality-filtered reads	Percent reads mapped	Portion properly paired / portion mapped in pair
SAMN16213049	Paired End	Root	150	55304136	52375894	93.572	96.8
SAMN16213050	Paired End	Leaf	150	53102832	50408452	95.148	97.2
SAMN16213053	Single End	Young Leaves 1	50	44939720	44718122	94.1271	N/A
SAMN16213054	Single End	Young Leaves 2	50	50573588	50333425	94.478	N/A
SAMN16213055	Single End	Young Leaves 3	50	48944953	48668245	94.4128	N/A
SAMN16213056	Single End	Mature Leaves 1	50	51268451	50909107	94.3415	N/A
SAMN16213057	Single End	Mature Leaves 2	50	59116844	58786628	93.4458	N/A
SAMN16213058	Single End	Mature Leaves 3	50	65100526	64695925	94.4315	N/A
SAMN16213059	Single End	Stems and Petioles 1	50	46670560	46437513	94.5774	N/A
SAMN16213060	Single End	Stems and Petioles 2	50	51663475	51422474	94.6633	N/A
SAMN16213061	Single End	Stems and Petioles 3	50	50376498	50082087	94.5545	N/A
SAMN16213062	Single End	Leaf Bracts	50	50662046	50299349	94.6056	N/A
SAMN16213063	Single End	Mature Leaves	50	54464430	54177391	94.1397	N/A
SAMN16213064	Single End	Root	50	63028235	62588443	93.6961	N/A
SAMN16213065	Single End	Leaves 6 days after wounding (6DAW)	50	47401299	47168910	95.1616	N/A

## Sheet: Table S5
Table S5. Repeat Masker Summary of Results of Elements in Mitragyna speciosa genome.
	Number of elements	Length Occupied	Percentage of Sequence
SINES:	80	6840	0
ALUs	0	0	0
MIRs	0	0	0
LINEs:	28874	277694	0.0247
LINE1	27946	274619	0.0245
LINE2	0	0	0
L3/CR1	0	0	0
LTR elements:	142493	1.48166e+06	0.132
ERVL	0	0	0
ERVL-MaLRs	0	0	0
ERV_classI	0	0	0
ERV_classII	0	0	0
DNA elements:	40904	10381930	0.0089
hAT-Charlie	146	10089	0
TcMar-Tigger	0	0	0
Unclassified:	579725	309651473	0.2759
Total interspersed repeats:		495976085	0.4418
Small RNA:	157	45240	0
Satellites:	624	107346	0.0001
Simple repeats:	3434	323091	0.0003
Low complexity:	131	17037	0

## Sheet: Table S6
Table S6. FPKM expression matrix of top five blast results of Mitragyna speciosa 'Rifat' working set of genes and Catharanthus roseus using BLASTP search (BLAST+ v2.6) (Camacho et al. 2009) from Cufflinks v2.2.1 (Trapnell et al. 2012).
		Young Leaves 1	Young Leaves 2	Young Leaves 3	Mature Leaves 1	Mature Leaves 2	Mature Leaves 3	Stems and Petioles 1	Stems and Petioles 2	Stems and Petioles 3	Leaf Bracts	Mature Leaves	Roots	Leaves 6 days after wounding (6DAW)
Predicted Ortholog	Gene	SAMN16213053	SAMN16213054	SAMN16213055	SAMN16213056	SAMN16213057	SAMN16213058	SAMN16213059	SAMN16213060	SAMN16213061	SAMN16213062	SAMN16213063	SAMN16213064	SAMN16213065
DXS	g5616.t1	28.3521	37.0196	31.1495	13.4147	43.9043	13.2331	4.86122	4.76362	4.55464	7.31742	6.35455	9.14926	6.19896
DXS	g30592.t1	50.0532	77.8351	70.9952	68.1436	244.639	73.313	9.62461	8.46034	9.04011	19.4649	25.3042	7.00172	13.8769
DXS	g25844.t1	6.67925	8.29128	7.17954	0.911339	3.40225	1.10008	4.67058	4.22606	5.85711	8.66581	1.01723	6.18591	2.65827
DXS	g58468.t1	5.10737	9.19821	6.15151	2.97412	12.292	4.64843	2.83217	3.87847	3.69524	6.52588	1.68407	7.20757	5.50137
DXS	g28961.t1	0.109372	0.0874402	0.113452	0.0107536	0	0.00960401	0.125434	0.0425381	0.184238	0.508201	0.0313499	0.84612	0
DXR	g72935.t1	22.8305	28.4409	24.3898	27.1709	43.531	24.2387	12.2675	16.6246	11.6372	15.9314	26.3523	30.5445	35.2519
DXR	g29769.t1	19.5908	23.7493	21.9541	21.8477	30.622	20.5233	11.2813	15.6633	12.7706	13.8263	26.9726	46.5618	41.9512
CMS	g65813.t1	12.4528	9.45814	9.98386	9.21945	9.04214	8.70225	6.7386	5.13729	6.20847	7.6226	6.82573	5.16596	7.00307
CMS	g38138.t1	4.71257	3.34509	2.92816	3.39338	3.00086	3.69189	2.11211	2.66731	2.37022	4.72969	3.56315	2.05731	2.51074
CMS	g46181.t1	17.0312	14.4342	18.3133	14.5983	15.1662	15.7577	11.443	8.02765	13.8362	12.3626	10.121	10.1375	8.11034
CMK	g12014.t1	41.2827	45.8835	44.1527	49.019	71.3669	42.7063	19.2278	18.2065	20.5351	31.1747	33.746	18.3771	17.9364
CMK	g61327.t1	42.9899	44.5274	51.2902	45.2628	70.1311	36.327	21.0871	19.8915	21.5633	29.6936	32.8019	29.0505	16.1843
MCS	g35243.t1	119.239	135.647	118.024	139.384	260.981	143.476	57.2022	61.484	57.8479	74.6196	77.0459	109.613	129.069
HDS	g76490.t1	12.377	12.1771	13.4401	9.81219	8.56391	7.37414	9.51771	8.9616	9.69349	11.2418	13.8846	13.9099	11.2105
HDS	g76462.t1	8.70167	10.9057	11.227	8.04468	7.97852	7.02705	4.88878	6.97972	7.0796	12.8828	9.93018	8.92876	12.1405
HDS	g50250.t1	27.9356	37.6741	35.4386	32.4197	69.0895	33.2939	12.5378	12.5458	12.494	13.1729	24.6826	21.1107	79.601
HDS	g66203.t1	26.9223	38.3256	39.5815	29.9849	60.1493	31.5773	11.8449	12.9896	12.0023	17.3011	23.1734	22.2889	44.6714
HDR	g68488.t1	90.6595	104.59	88.8191	119.318	154.675	118.749	70.3921	77.2863	70.0603	132.568	129.038	69.814	534.916
HDR	g34335.t1	37.2234	56.6325	56.7681	37.6848	82.6316	32.8197	14.7737	20.1141	16.6257	34.7955	20.8436	18.0173	10.0557
HDR	g31091.t1	57.1134	76.4399	82.0047	46.5674	121.736	44.0658	15.7358	19.4215	19.3725	55.3031	22.4503	14.7104	13.1011
IPI	g35985.t1	10.0392	7.69969	7.67956	1.60022	3.08993	3.01459	6.66164	2.77075	5.89572	4.5547	2.10285	5.18219	2.19616
IPI	g4788.t1	6.06988	6.18383	5.79227	1.16906	1.95691	1.56829	9.10573	5.09626	8.27101	6.24976	1.3345	7.06364	1.3327
IPI	g4868.t1	23.245	26.36	27.009	18.787	24.8186	8.49568	28.4215	19.0806	25.4304	13.4911	10.2257	88.3423	8.07251
IPI	g55034.t1	25.6598	38.2472	35.9341	11.9131	23.0333	9.16925	40.3832	28.2305	37.3463	23.621	8.8962	128.06	9.53963
GES	g3125.t1	19.5413	23.3818	18.5138	1.38012	0.802782	0.981046	14.0048	15.4377	15.9372	22.3992	3.83722	30.0532	1.10912
GES	g17779.t1	0	0	0	0	0	0	0	0	0	0	0	0	0
GES	g18012.t1	0	0	0	0	0	0	0	0	0	0	0	0	0
GES	g36211.t1	8.11536	11.9714	8.17396	0.475105	0.0908199	0.213228	4.79732	5.44521	5.19965	8.56289	1.5394	24.1047	0.383027
GES	g2763.t1	6.70995	0.0371607	8.06926	0.0892818	0	0	17.763	0.549339	25.9202	60.0452	0.0136308	0.0250491	0
G8H	g5495.t1	17.9257	19.6359	16.1562	7.09211	4.92862	4.81261	8.95331	13.9285	11.0407	10.5512	6.41133	22.8818	12.3466
G8H	g8247.t1	16.8314	17.6582	15.3308	2.23209	1.70124	1.85292	7.67906	14.0202	8.39503	10.9251	4.30224	22.1998	2.5509
G8H	g5079.t1_g5080.t1	1.59099	1.76576	1.65204	31.1252	4.72278	10.2283	5.90387	8.67427	5.66678	8.19208	18.1584	38.5727	2.43667
G8H	g26776.t1	0.358292	0.322416	0.266654	1.48155	0.591632	0.709445	0.737745	0.333711	0.512319	1.36419	0.392432	6.49528	0.354127
G8H	g26824.t1	0.177178	0.127284	0.0665511	2.21807	0.495165	1.13141	0.43567	0.248496	0.386261	0.400226	0.302089	5.89805	0.819063
GOR	g43657.t1	1.13671	1.00185	1.63786	1.91918	1.86334	1.10459	4.17378	6.37557	5.3153	2.18139	1.83457	3.94908	1.31272
GOR	g43654.t1	1.03913	1.29637	1.50202	5.11788	4.41077	2.78975	2.40493	4.6926	3.9342	2.31017	4.04633	4.97673	2.39382
GOR	g7400.t1	3.78204	3.63107	3.38904	2.15464	2.64263	3.35154	5.28517	5.57544	4.89771	3.57624	1.40822	6.90964	1.36281
GOR	g23663.t1	4.32866	5.22784	4.41157	3.66346	3.19478	2.92223	7.8114	6.6421	5.68084	4.88369	2.67454	9.55141	1.52139
GOR	g9809.t1	8.68036	10.4078	7.00127	5.58946	5.8232	7.53819	10.1807	15.1505	9.83646	10.1138	17.0289	19.2896	7.47742
ISY	g902.t1	27.6533	30.0249	24.3953	3.72652	2.02973	2.66641	19.6408	30.0593	26.1831	30.7545	10.0621	48.6012	4.03301
ISY	g16106.t1	49.3201	54.0248	42.9075	3.01404	1.79712	2.56728	36.1571	25.021	32.6836	27.089	6.3655	70.267	2.02576
ISY	g4839.t1	5.11004	4.22809	4.06238	7.4803	3.24869	4.15457	7.37669	6.34092	6.18981	3.74479	4.16224	8.43323	3.61379
ISY	g3214.t1	0.38083	0.48214	0.542236	0.443251	0.128425	0.20576	4.57926	7.72623	6.90293	2.42104	0.200617	9.83144	0.325887
ISY	g32213.t1	7.47309	7.06311	6.70366	12.0892	7.6442	8.24246	9.50527	10.271	9.43992	8.93609	11.9115	6.11296	8.27924
IO	g3012.t1	113.756	125.019	112.772	10.4851	9.57365	9.89592	60.57	68.9639	55.2473	56.7445	23.2251	125.743	33.8411
IO	g3013.t1	0.408061	0.413547	0.253621	0.0138575	0	0.0325774	0.224848	0.147855	0.169184	0.155838	0.0130623	7.72302	0.0675578
IO	g41222.t1	0.181345	0.178725	0.306763	0.0902625	0.18755	0.246628	0.144962	0.230201	0.122961	1.01098	0.776671	13.4053	0.877165
IO	g3014.t1	0	0	0.0328949	0.0809567	0.00910207	0.0797242	0.0110323	0	0.0208204	0.0846883	0.060076	17.1604	0
IO	g23132.t1	0.0152855	0	0	0	0	0	0.0141409	0	0.0518008	0.172336	0.0264253	2.61531	0
7DLGT	g11728.t1	2.1434	3.16608	2.70832	0.251154	0.0805933	0.239903	1.59111	2.64054	1.70097	1.50368	1.11085	11.0635	0.760852
7DLGT	g55628.t1	2.479	3.06403	2.60695	0.412759	0.187071	0.301327	1.24894	2.14066	1.72919	1.67949	1.18316	10.7079	0.704142
7DLGT	g11729.t1	0	0	0	0.136111	0	0	0.0143395	0.0129685	0	0	0	0.542842	0.0695447
7DLGT	g55629.t1	0	0	0	0	0	0	0.0439597	0	0	0	0	1.10815	0.0145233
7DLGT	g22517.t1	6.10323	8.81745	8.52883	1.06481	1.61032	1.52656	9.20568	5.71723	7.4266	2.67571	0.328754	6.96545	1.2021
7DLH	g69922.t1	15.3692	19.4952	16.6341	7.13255	5.44778	5.54286	17.1135	20.4176	15.6413	11.1074	6.666	19.4782	13.5001
7DLH	g40390.t1	9.21047	8.9308	8.28951	4.50311	3.37513	3.93079	5.47552	6.6712	5.96594	6.13109	4.1266	5.3211	9.28609
7DLH	g50466.t1	0	0	0	0.0275442	0	0	0.256386	0.364865	0.447804	0.123699	0	4.18567	0.0492014
7DLH	g30324.t1	6.15801	11.0734	10.1321	15.3441	3.51201	4.60779	24.907	10.6705	19.6399	14.1085	0.927836	449.217	3.95403
7DLH	g15986.t1	2.162	3.99058	4.4967	20.4014	17.0404	19.0907	3.98953	4.62348	5.09259	5.20066	35.4562	15.538	28.6181
LAMT	g58002.t1	8.02222	5.84016	4.87601	0.0603417	0.245272	0.711716	4.00702	0.189999	2.43443	17.7939	0.273969	9.14622	3.16343
LAMT	g450.t1	3.98314	1.0949	2.90906	0.475986	1.11949	2.32038	1.17158	0.436685	0.459537	3.75331	2.40559	10.0611	10.7625
LAMT	g740.t1	339.864	371.432	406.571	14.3611	4.45757	7.4125	142.603	26.1878	132.885	288.072	0.657512	262.971	10.1944
LAMT	g64266.t1	0.0561132	0.0338357	0.051628	1.40098	0.446774	0.838255	0.279782	0.0640886	0.0514628	0.222284	1.67406	6.82605	1.1794
LAMT	g32767.t1	0.0216768	0	0	0.231639	0.0309528	0.0415279	0.0215485	0	0	0.307415	0.403624	5.73996	0.138798
SLS	g67923.t1	151.139	200.229	165.68	17.3868	29.1896	25.0634	112.435	35.9732	98.178	131.249	16.6152	217.736	29.9319
SLS	g19163.t1	133.475	169.515	135.383	9.25803	17.4572	19.9642	92.6913	20.1055	74.3126	110.313	13.8905	229.422	40.3318
SLS	g30324.t1	6.15801	11.0734	10.1321	15.3441	3.51201	4.60779	24.907	10.6705	19.6399	14.1085	0.927836	449.217	3.95403
SLS	g50466.t1	6.18194	9.15565	10.1701	18.0772	5.75997	5.37286	21.0011	10.0344	16.826	13.2864	2.74626	341.389	4.37516
SLS	g58714.t1	120.9	166.564	170.295	288.399	389.999	308.696	54.1905	87.2647	57.2679	192.687	98.691	0.765203	176.11
TDC	g31807.t1	0	0.054561	0.0280929	0.146737	0.13219	0.097322	0.0145073	0.0134065	0	0.150177	0.06894	0.372846	0.139675
TDC	g583.t1	0.0156289	0.0138085	0.0143129	0.166741	0.183632	0.136934	0	0.0279761	0	0	0.324689	1.97862	0.0591629
TDC	g45290.t1	87.2633	128.014	128.222	0.0462848	0.0321099	0.12808	18.1318	0.157146	18.5571	49.5729	0.0629129	90.7763	0.0820313
TDC	g51916.t1	197.972	228.229	228.241	0.0117734	0.0216048	0.176168	121.686	4.27323	105.408	64.8946	0.148931	177.984	0.756909
TDC	g72899.t1	0	0	0	0	0	0	0	0	0	0	0	0	0
STR	g45289.t1	132.182	174.612	175.244	3.1745	9.56418	5.85868	110.945	38.5854	111.014	242.308	1.54431	30.2287	4.58003
STR	g51914.t1	53.0979	69.3639	66.3356	5.24907	9.68958	7.22817	90.8266	30.212	63.7475	93.8366	1.46202	36.1075	9.8884
STR	g51324.t1	0.495066	0.257065	0.208067	0	0.0126448	0	0.341792	0.191097	0.656545	0	0	1.87822	0.0299415
STR	g17948.t1	5.05651	8.5052	9.17397	10.0386	14.1452	7.32703	0.284016	0.0599809	0.203521	6.36378	7.41543	0.140322	9.76307
STR	g34402.t1	2.79322	3.18791	2.98663	5.6121	4.09657	3.34736	1.00853	2.89373	0.672465	15.6651	5.97415	0.39291	2.5939
MATE	g17940.t1	48.4204	46.5616	52.7906	39.5288	41.0746	44.5393	79.9427	100.468	93.8517	53.3139	54.3461	78.7694	36.2006
MATE	g34418.t1	24.3592	27.7191	30.4541	7.02169	7.24075	6.59652	23.87	22.4351	26.9896	32.1112	16.7747	57.1397	13.9826
MATE	g44513.t1	2.80154	2.3799	2.19398	7.05269	4.35878	5.23746	0.416398	0.13112	0.246433	3.07138	1.19557	0.283656	7.4245
MATE	g17757.t1	2.84076	1.55783	2.42073	4.90596	2.56398	2.68775	0.517857	0.296028	0.522121	3.2551	1.72157	0.36747	3.4243
MATE	g45286.t1	0.252515	0.258941	0.345045	0.023486	0.0313953	0.0604494	0.141636	0.280874	0.248719	0.221601	0.0325565	6.78434	0.566641
Strictosidinetransporter	g76519.t1	79.8278	93.5917	83.2731	2.95442	9.06584	9.8963	83.5907	38.8043	63.5043	46.5643	2.33887	94.4577	8.8538
Strictosidinetransporter	g15780.t1	0	0	0	0.0275442	0	0	0.256386	0.364865	0.447804	0.123699	0	4.18567	0.0492014
Strictosidinetransporter	g76517.t1	0.269273	0.211238	0.298093	0.705172	0.256013	0.327511	4.17543	5.58462	3.85935	1.45419	0.300342	5.79952	0.227873
Strictosidinetransporter	g19624.t1	1.04213	0.425988	0.838323	1.21889	0.632823	1.15665	3.33706	5.67353	3.65859	2.10088	1.34325	9.34885	0.0987603
Strictosidinetransporter	g76516.t1	0	0	0	0	0	0	0.0179834	0.0161607	0.102988	0.0165405	0.0143695	3.25492	0

## Sheet: Table S7
Table S7. Mitragyna speciosa Planti-SMASH (Kautsar et al. 2017) Biosynthetic Cluster Predictions.
Cluster Type	Number	Predicted Core Domains
Terpene	18	SQHop_cyclase_C, SQHop_cyclase_N, p450, AMP-binding, Terpene_synth, Terpene_synth_C, Transferase, Prenyltrans, 2OG-FeII_Oxy, Acetyltransf_1, DIOX_N, Epimerase, Peptidase_S10,
Saccharide-Terpene	2	Terpene_synth, Terpene_synth_C, UDPGT_2
Saccharide-Alkaloid	2	Bet_v_1, DIOX_N, UDPGT_2, adh_short_C2, Cellulose_synt, Peptidase_S10, Transferase, UDPGT_2
Saccharide	23	Cellulose_synt, Peptidase_S10, Transferase, UDPGT_2, DIOX_N, 2OG-FeII_Oxy, UDPGT_2, p450, DAHP_synth_2, adh_short, adh_short_C2, Epimerase, AMP-binding, polyprenyl_synt, Glycos_transf_1, Aminotran_1_2, Glycos_transf_2, SE
Putative	16	Methyltransf_7, NAD_binding_1, oMT, Aminotran_1_2, DIOX_N, Methyltransf_11, Methyltransf_3, Transferase, p450, 2OG-FeII_Oxy, DIOX_N, Transferase, Methyltransf_11, adh_short, 2OG-FeII_Oxy, DIOX_N, Amino_oxidase, Epimerase, FA_desaturase, polyprenyl_synt, Methyltransf_2
Polyketide-Alkaloid	2	Bet_v_1, Chal_sti_synt_C, Epimerase, Methyltransf_11, Chal_sti_synt_N
Polyketide	5	2OG-FeII_Oxy, Chal_sti_synt_C, DIOX_N,Chal_sti_synt_N, Chal_sti_synt_C, Epimerase, Chal_sti_synt_N, Methyltransf_7, Methyltransf_11
Lignan-Polyketide	1	Chal_sti_synt_C, Dirigent
Lignan	2	Dirigent, p450
Alkaloid	1	Cu_amine_oxid, Epimerase, p450
Total	72
